# Supplementary material for: PMN-MDSCs Enhance CTC Metastatic Properties through Reciprocal Interactions via ROS/Notch/Nodal Signaling
Source: MDPI journal article supplement (doi:10.3390/ijms20081916), 2019-04-18
Supplement: s1 [file s1]

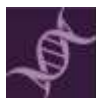

| Primary Cancer                        | Metastasis                                | HER-2 Status | ER/PR Status   | BRCAL/2 Status | Stage at diagnosis | Ki67 Status |
|---------------------------------------|-------------------------------------------|--------------|----------------|----------------|--------------------|-------------|
| Breast, brain mets unknown            | Node, liver, lung, bone                   | Pos          | Pos/Pos        | Not listed     | 4                  | Pos         |
| Breast                                | Bone, brain, liver, node, mastectomy      | Neg          | Pos/Neg        | Wild type      | 4                  | Pos         |
| Breast                                | Lung                                      | Neg          | Neg/Neg        | Neg            |                    |             |
| Breast                                | Bone, Lung, Nodes                         | Neg          | Pos/Weakly Pos | Wild type      | T1cN0M0            | Not listed  |
| Breast, brain mets unknown            | Node, liver, lung, bone                   | Pos          | Pos/Pos        | Not listed     | 4                  | Pos         |
| Breast Mastectomy                     | Nodes, liver, bone                        | Neg          | Neg/Neg        | Not listed     | 4                  | Pos         |
| Breast                                | Bones                                     | Neg          | Pos/Pos        | Neg            |                    |             |
| Brain Mets unknown, MASTECTOMY        | Node, axilla, left posterior pleura, skin | Neg          | Neg/Neg        | Neg            | pT1N0M0            | Not listed  |
| Breast Brain Mets unknown, MASTECTOMY | Node, axilla, left posterior pleura, skin | Neg          | Neg/Neg        | Neg            | pT1N0M0            | Not listed  |
| Breast                                | liver, bone, node, lung                   | Neg          | Pos/Pos        | BRCA 1 & 2     | 4                  | Not listed  |
| Breast Mastectomy                     | mets: liver and node                      | Neg          | Neg/Neg        | Wild type      | T2N0M0             | Pos         |
| Breast Mastectomy                     | mets: liver and node                      | Neg          | Neg/Neg        | Wild type      | T2N0M0             | Pos         |
| Breast Mastectomy                     | Node, lung, bone                          | Neg          | Weak Pos/Neg   | Wild type      | T4dN2aM0           | Pos         |
| Breast Mastectomy                     | Lung, node                                | Neg          | Neg/Neg        | Wild type      | 4                  | Not listed  |
| Breast Mastectomy                     | Lung, node                                | Equivocal    | Neg/Neg        | Not listed     | T2N0M0             | Pos         |

Figure S1. Breat cancer patients' clinical-pathological parameters.

| Gender | Age | Type of primary | If brain mets – brain as 1st site of metastatic presentation | Stage  | Mutation Status                   | Site of disease at time of sampling                                       | Hx or current Parenchymal brain mets | Previous Therapies                   | Current Therapy at time of blood draw | Disease status at time of blood draw         |
|--------|-----|-----------------|--------------------------------------------------------------|--------|-----------------------------------|---------------------------------------------------------------------------|--------------------------------------|--------------------------------------|---------------------------------------|----------------------------------------------|
| male   | 75  | NA              | concurrent                                                   | IV M1c | BRAF 597S                         | none                                                                      | yes                                  | ipi/nivo                             | nivo                                  | currently in complete remission              |
| female | 37  | cutaneous       | yes, with other sites                                        | IV M1c | BRAF V600E                        | brain, liver                                                              | yes                                  | dabrafenib/trametinib, pembro,       | pembro, dabrafenib/trametinib         | 10/2017-progression in brain and body        |
| Male   | 61  | cutaneous       | No                                                           | IV M1b | BRAF V600R                        | lung                                                                      | no                                   | nivo                                 | dabrafenib/trametinib                 | stable                                       |
| female | 30  | cutaneous       | no                                                           | IIIc   | TERTm p53, CDk4, BRAFV600E, BRCA2 | NED                                                                       | no                                   | none                                 | none                                  | NED                                          |
| male   | 45  | cutaneous       | no                                                           | IV M1a | BRAF V600E                        | LN                                                                        | no                                   | none                                 | dabrafenib/trametinib                 | improving                                    |
| female | 48  | cutaneous       | yes                                                          | IV M1c | unknown                           | brain, lung                                                               | yes                                  | adjuvant GMCSF                       | none                                  | progressing                                  |
| male   | 79  | mucosal         | no                                                           | IV M1b | KIT                               | lung, LN                                                                  | no                                   | ipi and nivo                         | nivo                                  | responding                                   |
| male   | 69  | NA              | yes                                                          | IV M1d | BRAF wildtype                     | brain, LMD, lung, abdomen/peritoneum/omentum/viscera                      | yes                                  | pembro                               | none                                  | progressing                                  |
| male   | 41  | NA              | no                                                           | IIIc   | NRAS, RB1, p53                    | NED                                                                       | no                                   | neoadjuvant nivo                     | none                                  | NED                                          |
| male   | 68  | cutaneous       | no                                                           | IIIc   | BRAF V600E                        | SQ                                                                        | no                                   | pembro                               | pembro                                | responding                                   |
| female | 61  | cutaneous       | no                                                           | IV M1c | no BRAF                           | SQ, lung, LN                                                              | no                                   | None                                 | none                                  | progressing and treatment naive              |
| female | 48  | cutaneous       | yes                                                          | IV M1c | unknown                           | brain, lung                                                               | yes                                  | adjuvant GMCSF                       | none                                  | progressing                                  |
| male   | 69  | cutaneous       | yes                                                          | IV M1c | NRAS, CDKN2a, KIT                 | brain, SQ, ST/muscle, lung, liver, LN, abdomen/peritoneum/omentum/viscera | yes                                  | none                                 | none                                  | progressing                                  |
| male   | 45  | cutaneous       | no                                                           | IV M1a | BRAF V600E                        | LN                                                                        | no                                   | none                                 | dabrafenib/trametinib                 | improving                                    |
| female | 30  | cutaneous       | no                                                           | IIIc   | TERTm p53, CDk4, BRAFV600E, BRCA2 | NED                                                                       | no                                   | none                                 | none                                  | NED                                          |
| female | 42  | cutaneous       | no                                                           | IIIa   | unknown                           | NED                                                                       | no                                   | none                                 | none                                  | NED                                          |
| Male   | 49  | cutaneous       | No                                                           | IV M1c | BRAF V600E                        | brain, lung                                                               | no                                   | Polynoma, Ipi, Dabrafenib/Trametinib | Ipi/Nivo                              | worsening brain mets, worsening extracranial |
| male   | 54  | cutaneous       | no                                                           | IV M1c | BRAF V600E, CDKN2A                | brain                                                                     | yes                                  | PV10                                 | none                                  | new brain mets                               |
| female | 44  | cutaneous       | NA                                                           | IIIb   | BRAF V600E, KDR, MAP2K1           | NED                                                                       | no                                   | none                                 | none                                  | NED                                          |

Figure S2. Melanoma patients' clinical-pathological parameters.

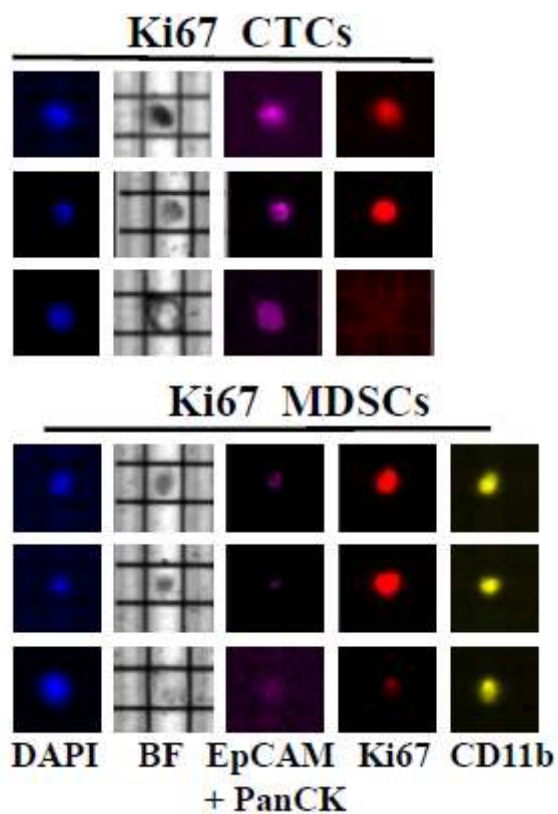

**Figure S3.** DEPAarray analyses of CTCs and MDSCs dissociated from co-cultures and stained for respective biomarkers and Ki67. Ki67-positive cells represented 75% of all CTCs and 66% of all MDSCs, respectively.

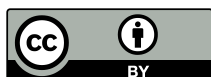

© 2019 by the authors. Licensee MDPI, Basel, Switzerland. This article is an open access article distributed under the terms and conditions of the Creative Commons Attribution (CC BY) license (<http://creativecommons.org/licenses/by/4.0/>).
